# Supplementary material for: A Two-Layer BiLSTM distillation-based method for network intrusion detection
Source: Research Square preprint supplement (doi:10.21203/rs.3.rs-7316391/v1), 2025-08-14
Supplement: Supplementary file 1 [file a47c4668146695bc245de5ba.docx]

# Highlights

· **Innovative Double-Distilled BiLSTM Model**
The study introduces a dual-layer BiLSTM model with double distillation and attention mechanisms, enhancing feature extraction and classification in intrusion detection with impressive accuracy.

· **Performance on Benchmark Datasets**
The model achieved 99.32% accuracy on CIC_IDS2017 and 99.86% on UNSW-NB15 datasets, showcasing robust detection of complex attack patterns and handling data imbalance effectively.

· **Enhanced Temporal Feature Analysis**
By combining forward and backward processing in BiLSTM layers, the model captures rich contextual information from sequential data, improving the understanding of temporal attack behaviors.
